# Supplementary material for: Diabetic nephropathy in a sibling and albuminuria predict early GFR decline: a prospective cohort study
Source: PubMed Central journal article supplement (PMC3703258; doi:10.1186/1471-2369-14-124), 2013-06-17
Supplement: 1471-2369-14-124-S1.pdf [file 1471-2369-14-124-S1.pdf]

**Figure 1**

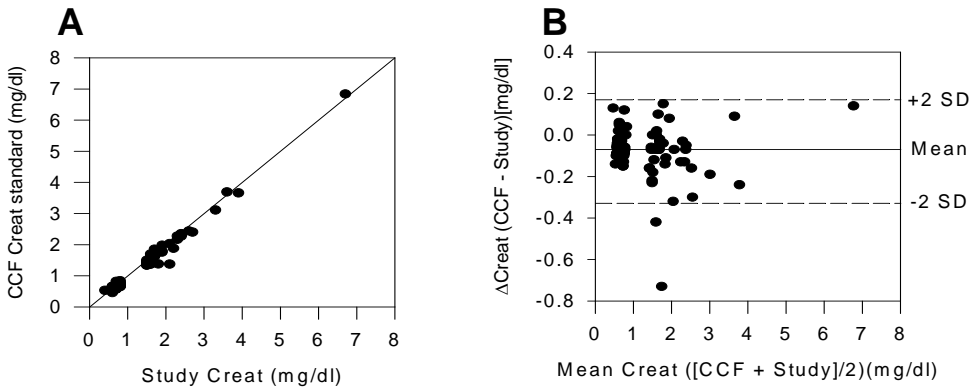

Creatinine assay validation from 40 samples. A, original study creatinine value (X-axis) versus quality control creatinine assay value obtained at Cleveland Clinic Foundation (CCF) reference laboratory (Y-axis). The two values were highly significantly correlated, with a mean difference between measurements = 0.07 mg/dl. B, Bland-Altman plot measuring the difference between the two assay values for each sample (Y-axis) versus mean values between samples (X-axis).

**Table 1.** Comparison of baseline patient characteristics between centers

|                                                          | <u>Cases (CWRU)</u> | <u>Cases (WFU)</u> | <u>p-value</u> | <u>Controls (CWRU)</u> | <u>Controls (WFU)</u> | <u>p-value</u> |
|----------------------------------------------------------|---------------------|--------------------|----------------|------------------------|-----------------------|----------------|
| N                                                        | 298                 | 137                |                | 280                    | 120                   |                |
| Gender (% female)                                        | 64.8                | 58.4               | 0.20           | 72.5                   | 54.2                  | < 0.01         |
| Age (yr)                                                 | 58.7 ± 10.7         | 59.2 ± 10.2        | 0.65           | 57.9 ± 12.0            | 64.6 ± 9.8            | < 0.01         |
| Race (% AA)                                              | 51.0                | 52.6               | 0.76           | 48.6                   | 61.7                  | 0.02           |
| Diabetes duration (yr)                                   | 14.6 ± 9.5          | 12.9 ± 9.9         | 0.09           | 17.2 ± 9.2             | 17.2 ± 7.8            | 1.00           |
| HbA1c (%)                                                | 7.7 ± 1.9           | 7.6 ± 1.8          | 0.60           | 7.9 ± 2.1              | 7.5 ± 1.5             | 0.06           |
| Systolic BP (mm Hg)                                      | 136.2 ± 18.9        | 133.6 ± 15.5       | 0.16           | 134.2 ± 21.8           | 134.2 ± 15.8          | 1.0            |
| Diastolic BP (mm Hg)                                     | 75.8 ± 12.3         | 76.0 ± 10.3        | 0.87           | 74.6 ± 13.2            | 74.8 ± 9.6            | 0.88           |
| eGFR <sub>creat</sub> (ml/min/1.73 m <sup>2</sup> )      | 73.5 ± 29.0         | 76.0 ± 24.5        | 0.38           | 77.5 ± 22.1            | 72.9 ± 20.1           | 0.05           |
| eGFR <sub>creat+cysC</sub> (ml/min/1.73 m <sup>2</sup> ) | 73.9 ± 30.8         | 74.0 ± 25.7        | 0.97           | 78.6 ± 24.6            | 74.7 ± 22.8           | 0.14           |
| Urine alb:creat (mg/g)                                   | 33 (10-139)         | 19 (8-87)          | 0.36           | 12 (7-22)              | 9 (5-19)              | <0.01          |

Data are presented as mean ± standard deviation for continuous measures, % frequency of reference level for discrete measures and median (first quartile-third quartile) for urine alb:creat (mg/g). Analyses to generate p-values include t-tests,  $\chi^2$  tests and Wilcoxon rank-sum tests where appropriate.

**Table 2.** Baseline covariate effects on  $eGFR_{\text{creat+cysC}}$  using linear mixed effects model parameter estimates, 95% confidence intervals and p-values

| Effect                         | Estimate ( $\beta_{\text{Basic}}$ ) | 95% CI         | p-value |
|--------------------------------|-------------------------------------|----------------|---------|
| Risk group (high vs. low)      | 1.65                                | (-1.32, 4.62)  | 0.277   |
| Year                           | -0.90                               | (-1.60, -0.21) | 0.012   |
| Risk group by year interaction | -1.38                               | (-2.18, -0.58) | <0.001  |
| Diabetes duration              | 0.00                                | (-0.12, 0.12)  | 0.955   |
| $eGFR_{\text{creat+cysC}}$     | 0.76                                | (0.71, 0.80)   | <0.001  |
| Urine alb:creat ratio          | -2.94                               | (-5.04, -0.84) | 0.008   |
| Systolic BP                    | -0.05                               | (-0.11, 0.02)  | 0.147   |
| Diastolic BP                   | 0.05                                | (-0.06, 0.16)  | 0.371   |
| HbA1c                          | -0.11                               | (-0.85, 0.63)  | 0.774   |
